# Supplementary material for: Excess mortality among non-COVID-19 surgical patients attributable to the exposure of French intensive and intermediate care units to the pandemic
Source: Springer Nature journal article supplement (doi:10.1007/s00134-023-07000-3), 2023-02-25
Supplement: MOESM1 [file 134_2023_7000_MOESM1_ESM.pdf]

## **SUPPLEMENTARY INFORMATION**

Excess mortality among non-COVID-19 surgical patients attributable to the exposure of French intensive and intermediate care units to the pandemic

**sMethod 1.** French standards for definition of ICU/IMCU

**sMethod 2.** Introduction to the triple-difference design

**sMethod 3.** Construction of the pandemic exposure variable for patients operated at a given hospital

**sTable 1.** Simple, double, and triple differences in standardized surgical mortality rates between years, pandemic exposure groups, and semesters

**sTable 2.** Excess deaths related to the COVID-19 exposure group

**sTable 3.** Characteristics of surgical inpatient stays by pandemic exposure group – stratified on subpopulation of postoperative deaths inside versus outside ICU/IMCU

**sFigure 1.** Study flowchart

**sFigure 2.** Share of surgical procedures admitted to the ICU/IMCU by pandemic exposure group

**sFigure 3.** Change in exposure to COVID-19 in ICU/IMCU over time per region (A) and per hospital (B)

**sFigure 4.** Comparison of in-hospital surgical mortality risk between pandemic exposure groups by semester with related learning effect – stratified on subpopulation of elective surgeries (A), emergency surgeries (B), and patients admitted in ICU/IMCU, ICU and IMCU (C)

**sFigure 5.** Number of Surgical Procedures and Deaths in 2020, inside and outside ICU/IMCU

This supplementary information has been provided by the authors to give readers additional information about their work.

#### **AUTHORS**

Antoine Duclos, Quentin Cordier, Stéphanie Polazzi, Cyrille Colin, Thomas Rimmelé, Jean-Christophe Lifante, Matthew J Carty, Laurent Boyer

#### **CORRESPONDING AUTHOR**

Prof. Antoine Duclos, antoineduclos@yahoo.fr

Research on Healthcare Performance (RESHAPE), INSERM U1290, Université Claude Bernard Lyon 1, France

Health Data Department, Hospices Civils de Lyon, France

### **sMethod 1. French standards for definition of ICU/IMCU\***

Intensive Care Units (ICU) manage patients presenting or at risk of presenting life-threatening organ failure, either hemodynamic, renal or respiratory. These patients need extended life-sustaining procedures such as invasive ventilation, hemodynamic support, or kidney replacement therapy. The French law formally recommends two nurses per five patients within the ICU.

Intermediate Care Units (IMCU) manage patients at risk of presenting organ failure requiring close monitoring or with unstable health status not allowing them to be discharged to a classic hospital unit. Theoretically, IMCU are not allowed to provide extended life-sustaining procedures such as invasive ventilation. IMCUs constitute intermediate levels of care at hospitals, between ICUs and classical care units. While no legal rules exist, one nurse per five patients is common within IMCU.

ICU traditionally admit either medical or surgical patients urgently needing life-sustaining procedures, while IMCU are mainly dedicated to planned postoperative care and monitoring of surgical patients. However, differences between ICU and IMCU were not as marked during times of pandemic surges and varied across French hospitals that adapted over time depending on the level of COVID-19 exposure in their own beds. ICU bed capacity therefore increased as needed by equipping and staffing IMCU beds appropriately, and additional IMCU bed capacity potentially occurred by temporary upgrading beds in classical care units.

\* Journal Officiel de la République Française- (2003) Circulaire DHOS/SDO n° 2003-413 du 27 août 2003 relative aux établissements de santé publics et privés pratiquant la réanimation, les soins intensifs et la surveillance continue [Légifrance 2003] <https://solidarites-sante.gouv.fr/fichiers/bo/2003/03-45/a0453485.htm>. Accessed 3 January 2023.

## sMethod 2. Introduction to the triple-difference design

The triple-difference design (or DDD for difference-in-differences-in-differences) is an extension of the usual double-difference design (or DD for differences-in-differences) and is employed to add a 3<sup>rd</sup> dimension of comparison. In our study, the three dimensions were the time (2020 versus 2019, first difference), the pandemic exposure (high versus moderate and versus low-or-no exposure, second difference) and the semester (semester 2 [Jul-Dec] versus semester 1 [Jan-Jun], third difference).

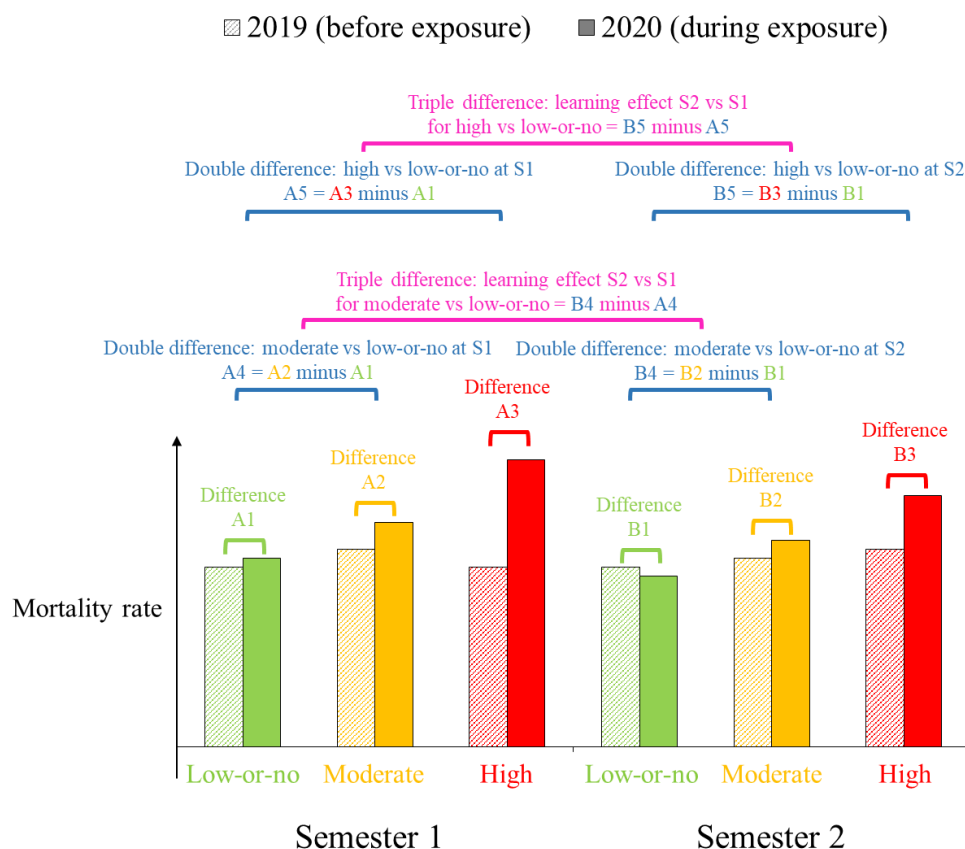

Figure: Triple-difference design between 2019 and 2020, COVID-19 exposure groups and semester

First difference (time): we compared the change in mortality after versus before the pandemic (2020 versus 2019) within every exposure group (high, moderate, and low-to-no) using adjusted Odds Ratios (ORs) derived from the estimates of the triple-difference model. An OR greater than one indicated an increase in mortality risk for patients among a specific exposure group in 2020 compared to the pre-pandemic 2019 period. These ORs correspond to the first level of differences colored in green, yellow and red in the figure (A1, A2, A3, B1, B2 and B3).

Second difference (pandemic exposure): we compared the change in mortality after versus before the pandemic (2020 versus 2019) between two exposure groups (high versus low-to-no, and moderate versus low-to-no) using adjusted Ratios of Odds Ratios (RORs) derived from the estimates of the triple-difference model. A ROR greater than one indicated an increase in mortality risk for patients in a given exposure group in comparison to the exposure reference. These RORs correspond to the second level of differences colored in blue in the figure (A4, B4, A5, B5).

Third difference (semester): we compared the change in mortality after versus before the pandemic (2020 versus 2019) between two exposure groups (high versus low-to-no, and moderate versus low-to-no) from one semester to the other (second versus first semester), using adjusted Ratios of Ratios of Odds Ratios (RRORs) derived from the estimates of the triple-difference model. A RROR less than one indicated a decrease in mortality risk for patients during the second semester against the first, hence a learning effect with significant improvement. These RRORs correspond to the third level of differences colored in pink in the figure.

### sMethod 3. Construction of the pandemic exposure variable for patients operated at a given hospital

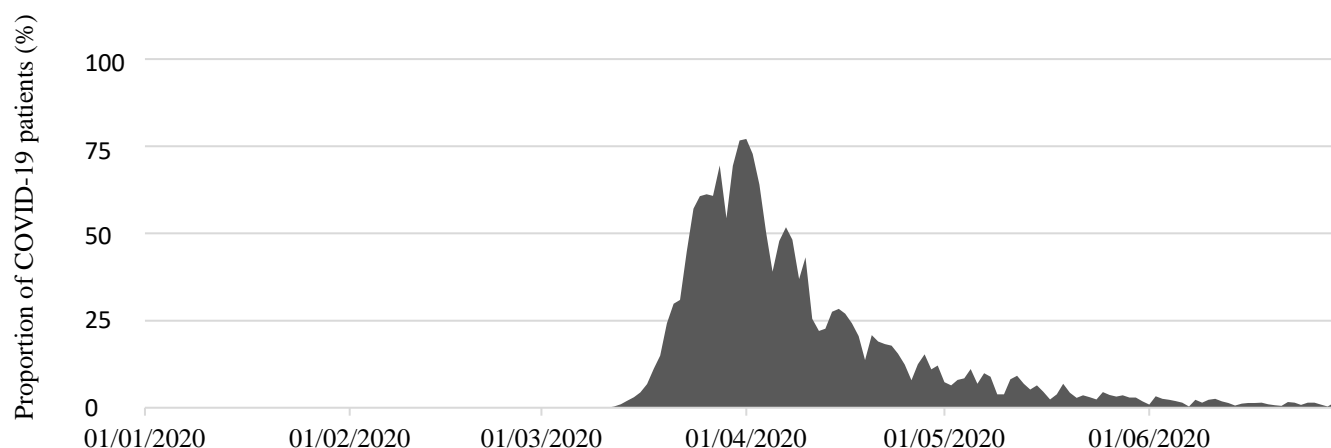

| Non-COVID-19 Patient | Stay                    | Median pandemic exposure | Year                         | Categories of median pandemic exposure     |
|----------------------|-------------------------|--------------------------|------------------------------|--------------------------------------------|
| A                    | 08/03/2020 – 12/03/2020 | 2%                       | 2020                         | Low exposure (< 30%)                       |
| B                    | 29/03/2020 – 02/04/2020 | 70%                      | 2020                         | High exposure ( $\geq 60\%$ )              |
| C                    | 12/04/2020 – 16/04/2020 | 34%                      | 2020                         | Moderate exposure ( $\geq 30\%$ and < 60%) |
| D                    | 04/03/2019 – 12/03/2019 | 1%                       | 2019<br>(Projected exposure) | Low exposure (< 30%)                       |
| E                    | 24/03/2019 – 01/04/2019 | 68%                      | 2019<br>(Projected exposure) | High exposure ( $\geq 60\%$ )              |

 Stays in 2019: ‘mirrored’ exposure
  Stays in 2020: ‘true’ exposure

The daily proportion of COVID-19 patients among all patients treated in the ICU/IMCU (intensive or intermediate care units) of a given hospital (defined as pandemic exposure) is plotted between Jan 1, 2020 and Jun 30, 2020. We indicated the median pandemic exposure for five non-COVID-19-symptomatic patients (patients “A” to “E”) who underwent a surgery in this hospital and who would potentially have needed to be admitted to the ICU/IMCU following their surgeries. Pandemic exposure for the non-COVID-19 2020 patients corresponded to the median of the daily pandemic exposure in the hospital ICU/IMCU during their stay, whether or not they were admitted to the ICU/IMCU, and was a priori categorized into three groups: low-or-no exposure less than 30%, moderate exposure between 30% and 60%, and high exposure greater than 60%. The pandemic exposure of control patients operated in 2019, before the pandemic, corresponded to a mirrored “fictive exposure” that those patients would have endured during their stay, if they had undergone surgery on the same dates and within the same hospital in 2020.

In this example, the non-COVID-19 patient “A” was hospitalized between Mar 8, 2020 and Mar 12, 2020. Because median pandemic exposure was 2% in this hospital ICU/IMCU during his/her stay, he/she was considered as a patient with low-or-no exposure in the analysis (< 30%). The non-COVID-19 patient “B” was hospitalized between Mar 29, 2020 and Apr 2, 2020. Because median pandemic exposure was 70% in that hospital ICU/IMCU during his/her stay, he/she was considered as a patient with high exposure in the analysis ( $\geq 60\%$ ). The non-COVID-19 patient “C” was hospitalized between Apr 12, 2020 and Apr 16, 2020. Because median pandemic exposure was 34% in that hospital ICU/IMCU during his/her stay, he/she was considered as a patient with moderate exposure in the analysis ( $\geq 30\%$  and < 60%). Moreover, the non-COVID-19 patients “D” and “E” were hospitalized in the same hospital between Mar 4, 2019 and Mar 12, 2019 for the “D”, and between Mar 24, 2019 and Apr 1, 2019 for the “E”. Because the projected 2020 median pandemic exposure would have been respectively 1% and 68% during their stays, they were considered as patients with a low-or-no (< 30%) and high exposure ( $\geq 60\%$ ) respectively, in the analysis.

**sTable 1. Simple, double, and triple differences in standardized in-hospital surgical mortality rates between years, pandemic exposure groups, and semesters**

|                    | Semester 1                                   |                                              |                                                                              | Semester 2                                   |                                              |                                                                              | Within Semester 1                                                                 | Within Semester 2                                                                | Triple Difference                                                                 |
|--------------------|----------------------------------------------|----------------------------------------------|------------------------------------------------------------------------------|----------------------------------------------|----------------------------------------------|------------------------------------------------------------------------------|-----------------------------------------------------------------------------------|----------------------------------------------------------------------------------|-----------------------------------------------------------------------------------|
|                    | Observed<br>in-hospital<br>deaths in<br>2019 | Observed<br>in-hospital<br>deaths in<br>2020 | Difference in<br>standardized in-<br>hospital mortality<br>(95% CI), P value | Observed<br>in-hospital<br>deaths in<br>2019 | Observed<br>in-hospital<br>deaths in<br>2020 | Difference in<br>standardized in-<br>hospital mortality<br>(95% CI), P value | Differences between<br>years and pandemic<br>exposure groups<br>(95% CI), P value | Differences between<br>year and pandemic<br>exposure groups<br>(95% CI), P value | between years,<br>pandemic exposure<br>groups, and semesters<br>(95% CI), P value |
| All deaths         |                                              |                                              |                                                                              |                                              |                                              |                                                                              |                                                                                   |                                                                                  |                                                                                   |
| Low-or-no exposure | 8,534<br>(1.9%)                              | 8,008<br>(2.0%)                              | 0.0% (-0.1% to 0.1%)<br>P=.96                                                | 8,171<br>(2.0%)                              | 7,719<br>(1.9%)                              | 0.0% (0.0% to 0.1%)<br>P=.16                                                 | ..                                                                                | ..                                                                               | ..                                                                                |
| Moderate exposure  | 1,058<br>(2.4%)                              | 696<br>(3.2%)                                | 0.1% (-0.1% to 0.4%)<br>P=.16                                                | 1,292<br>(2.3%)                              | 1,229<br>(2.5%)                              | 0.2% (0.0% to 0.4%)<br>P=.03                                                 | 0.2% (0.0% to 0.4%)<br>P=.16                                                      | 0.2% (0.0% to 0.4%)<br>P=.11                                                     | 0.0% (-0.3% to 0.3%)<br>P=.88                                                     |
| High exposure      | 430<br>(1.9%)                                | 259<br>(3.4%)                                | 1.0% (0.6% to 1.4%)<br>P<.001                                                | 150<br>(1.8%)                                | 120<br>(2.0%)                                | 0.4% (0.0% to 1.0%)<br>P=.05                                                 | 1.0% (0.6% to 1.4%)<br>P<.001                                                     | 0.4% (-0.2% to 0.9%)<br>P=.08                                                    | -0.6% (-1.3% to 0.0%)<br>P=.04                                                    |
| Inside ICU/IMCU    |                                              |                                              |                                                                              |                                              |                                              |                                                                              |                                                                                   |                                                                                  |                                                                                   |
| Low-or-no exposure | 4,897<br>(1.1%)                              | 4,487<br>(1.1%)                              | 0.0% (-0.1% to 0.0%)<br>P=.47                                                | 4,724<br>(1.1%)                              | 4,337<br>(1.1%)                              | 0.0% (0.0% to 0.1%)<br>P=.54                                                 | ..                                                                                | ..                                                                               | ..                                                                                |
| Moderate exposure  | 668<br>(1.5%)                                | 358<br>(1.7%)                                | -0.1% (-0.3% to 0.2%)<br>P=.20                                               | 701<br>(1.2%)                                | 593<br>(1.2%)                                | 0.1% (-0.1% to 0.3%)<br>P=.38                                                | -0.1% (-0.3% to 0.2%)<br>P=.29                                                    | 0.1% (-0.1% to 0.2%)<br>P=.52                                                    | 0.2% (-0.1% to 0.4%)<br>P=.24                                                     |
| High exposure      | 282<br>(1.2%)                                | 118<br>(1.5%)                                | 0.3% (0.0% to 0.9%)<br>P=.05                                                 | 82<br>(1.0%)                                 | 37<br>(0.6%)                                 | -0.1% (-0.6% to 0.5%)<br>P=.81                                               | 0.3% (0.0% to 0.9%)<br>P=.04                                                      | -0.1% (-0.6% to 0.5%)<br>P=.86                                                   | -0.4% (-1.0% to 0.3%)<br>P=.30                                                    |
| Outside ICU/IMCU   |                                              |                                              |                                                                              |                                              |                                              |                                                                              |                                                                                   |                                                                                  |                                                                                   |
| Low-or-no exposure | 3,637<br>(0.8%)                              | 3,521<br>(0.9%)                              | 0.0% (0.0% to 0.1%)<br>P=.46                                                 | 3,447<br>(0.8%)                              | 3,382<br>(0.8%)                              | 0.0% (0.0% to 0.1%)<br>P=.19                                                 | ..                                                                                | ..                                                                               | ..                                                                                |
| Moderate exposure  | 390<br>(0.9%)                                | 338<br>(1.6%)                                | 0.2% (0.0% to 0.4%)<br>P<.001                                                | 591<br>(1.0%)                                | 636<br>(1.3%)                                | 0.1% (0.0% to 0.3%)<br>P=.03                                                 | 0.2% (0.0% to 0.4%)<br>P=.002                                                     | 0.1% (0.0% to 0.2%)<br>P=.09                                                     | -0.1% (-0.3% to 0.2%)<br>P=.26                                                    |
| High exposure      | 148<br>(0.6%)                                | 141<br>(1.8%)                                | 0.7% (0.3% to 1.0%)<br>P<.001                                                | 68<br>(0.8%)                                 | 83<br>(1.4%)                                 | 0.3% (0.0% to 0.7%)<br>P=.03                                                 | 0.7% (0.3% to 0.9%)<br>P<.001                                                     | 0.3% (0.0% to 0.7%)<br>P=.04                                                     | -0.3% (-0.8% to 0.1%)<br>P=.08                                                    |

Data are n (%).

ICU/IMCUs were defined as intensive or intermediate care units.

These absolute differences in standardized rates were calculated using estimated regression coefficients obtained from the triple-difference GEE models and a marginal standardization method. They represent the Absolute Differences in standardized Rates between 2020 and 2019 per semester in each pandemic exposure group (low-or-no [0%-30%], moderate [30%-60%], and high [60%-100%]). The corresponding 95% confidence intervals were computed from non-parametric bootstrap based on 1,000 replications. P values were obtained directly from the models.

**sTable 2. Excess in-hospital deaths related to the COVID-19 exposure group**

| Covid-19 exposure            |                               | Semester 1              | Semester 2              | Full year              |
|------------------------------|-------------------------------|-------------------------|-------------------------|------------------------|
| Low-or-no<br>[0-30%]         | Surgical volume in 2020       | 392,211                 | 402,805                 | 795,016                |
|                              | In-hospital mortality in 2020 |                         |                         |                        |
|                              | Deaths                        | 8,008                   | 7,719                   | 15,727                 |
|                              | Inside ICU/IMCU deaths        | 4,497                   | 4,337                   | 8,824                  |
|                              | Outside ICU/IMCU deaths       | 3,521                   | 3,382                   | 6,903                  |
| Moderate<br>[30-60%]         | Surgical volume in 2020       | 21,534                  | 48,430                  | 69,964                 |
|                              | In-hospital mortality in 2020 |                         |                         |                        |
|                              | Deaths                        | 696                     | 1,229                   | 1,925                  |
|                              | Inside ICU/IMCU deaths        | 358                     | 593                     | 951                    |
|                              | Outside ICU/IMCU deaths       | 338                     | 636                     | 974                    |
|                              | Deaths in excess              |                         |                         |                        |
|                              | Deaths                        | 48 (-26 to 116)         | 98 (-11 to 197)         | 147 (17 to 269)        |
|                              | Inside ICU/IMCU deaths        | -30 (-87 to 23)         | 27 (-53 to 100)         | -2 (-108 to 86)        |
|                              | Outside ICU/IMCU deaths       | 75 (28 to 121)          | 73 (1 to 146)           | 148 (65 to 238)        |
|                              | Share of deaths in excess     |                         |                         |                        |
|                              | Deaths                        | 6.9% (-3.8% to 16.7%)   | 8.0% (-0.9% to 16.0%)   | 7.6% (0.9% to 16.7%)   |
| High<br>[60-100%]            | Inside ICU/IMCU deaths        | -8.2% (-24.4% to 6.3%)  | 4.6% (-8.9% to 16.8%)   | -0.2% (-11.3% to 9.1%) |
|                              | Outside ICU/IMCU deaths       | 22.3% (8.4% to 35.7%)   | 11.5% (0.1% to 23.0%)   | 15.2% (6.7% to 24.4%)  |
|                              | Surgical volume in 2020       | 7,716                   | 6,109                   | 13,825                 |
|                              | In-hospital mortality in 2020 |                         |                         |                        |
|                              | Deaths                        | 259                     | 120                     | 379                    |
|                              | Inside ICU/IMCU deaths        | 118                     | 37                      | 155                    |
|                              | Outside ICU/IMCU deaths       | 141                     | 83                      | 224                    |
|                              | Deaths in excess              |                         |                         |                        |
|                              | Deaths                        | 93 (59 to 130)          | 21 (-6 to 48)           | 114 (69 to 159)        |
|                              | Inside ICU/IMCU deaths        | 25 (0 to 50)            | -2 (-19 to 15)          | 23 (-8 to 53)          |
|                              | Outside ICU/IMCU deaths       | 70 (45 to 98)           | 24 (0 to 47)            | 94 (59 to 133)         |
|                              | Share of deaths in excess     |                         |                         |                        |
| Moderate + High<br>[30-100%] | Deaths                        | 35.9% (22.8% to 50.0%)  | 17.4% (-5.1% to 40.3%)  | 30.0% (18.3% to 42.0%) |
|                              | Inside ICU/IMCU deaths        | 21.1% (0.2% to 42.4%)   | -5.0% (-51.4% to 39.7%) | 14.9% (-5.1% to 34.1%) |
|                              | Outside ICU/IMCU deaths       | 49.6% (31.6% to 69.4%)  | 29.2% (0.2% to 57.1%)   | 42.1% (26.4% to 59.2%) |
|                              | Surgical volume in 2020       | 29,250                  | 54,539                  | 83,789                 |
|                              | In-hospital mortality in 2020 |                         |                         |                        |
|                              | Deaths                        | 955                     | 1,349                   | 2,304                  |
|                              | Inside ICU/IMCU deaths        | 476                     | 630                     | 1,106                  |
|                              | Outside ICU/IMCU deaths       | 479                     | 719                     | 1,198                  |
|                              | Deaths in excess              |                         |                         |                        |
|                              | Deaths                        | 141 (60 to 220)         | 119 (5 to 220)          | 260 (120 to 393)       |
|                              | Inside ICU/IMCU deaths        | -5 (-71 to 54)          | 26 (-58 to 98)          | 21 (-91 to 116)        |
|                              | Outside ICU/IMCU deaths       | 145 (91 to 200)         | 97 (19 to 176)          | 242 (145 to 336)       |
|                              | Share of deaths in excess     |                         |                         |                        |
|                              | Deaths                        | 14.8% (6.2% to 23.1%)   | 8.8% (0.4% to 16.3%)    | 11.3% (5.2% to 17.0%)  |
|                              | Inside ICU/IMCU deaths        | -1.0% (-14.9% to 11.3%) | 4.1% (-9.2% to 15.5%)   | 1.9% (-8.2% to 10.5%)  |
|                              | Outside ICU/IMCU deaths       | 30.3% (19.1% to 41.7%)  | 13.5% (2.7% to 24.5%)   | 20.2% (12.1% to 28.0%) |

ICU/IMCUs were defined as intensive or intermediate care units.

Excess deaths in the moderate and high exposure groups were calculated in comparison to the low-or-no exposure group. They were calculated separately and subsequently summed. Using the RORs (ratios of odds ratios) obtained from the triple-difference GEE models, we calculated the etiologic fraction, i.e. the share of deaths that would have been avoided if the exposure was low-or-no, and multiplied this value by the observed number of deaths in 2020.

The corresponding 95% confidence intervals were computed from non-parametric bootstrap based on 1,000 replications.

Inside and outside ICU/IMCU excess deaths might not exactly sum to the total excess deaths because of the use of a different model for each outcome.

**sTable 3. Characteristics of surgical inpatient stays by pandemic exposure group – stratified on subpopulation of postoperative deaths inside versus outside ICU/IMCU**

|                                                 | Surgical stays with postoperative death in 2020      |                                            |                                                      |                                           |                                                   |                                           |
|-------------------------------------------------|------------------------------------------------------|--------------------------------------------|------------------------------------------------------|-------------------------------------------|---------------------------------------------------|-------------------------------------------|
|                                                 | Low-or-no Covid-19 exposure <sup>a</sup><br>[0%-30%[ |                                            | Moderate Covid-19 exposure <sup>a</sup><br>[30%-60%[ |                                           | High Covid-19 exposure <sup>a</sup><br>[60%-100%] |                                           |
|                                                 | Death inside<br>ICU/IMCU<br><b>n=8824</b>            | Death outside<br>ICU/IMCU<br><b>n=6903</b> | Death inside<br>ICU/IMCU<br><b>n=951</b>             | Death outside<br>ICU/IMCU<br><b>n=974</b> | Death inside<br>ICU/IMCU<br><b>n=155</b>          | Death outside<br>ICU/IMCU<br><b>n=224</b> |
| <b>Characteristic</b>                           |                                                      |                                            |                                                      |                                           |                                                   |                                           |
| Mean patient age (years)                        | 71.3 (13.3)                                          | 79.8 (12.6)                                | 70.2 (13.0)                                          | 80.2 (12.3)                               | 70.3 (13.5)                                       | 80.6 (11.6)                               |
| Male patient sex (%)                            | 63.1                                                 | 54.1                                       | 63.5                                                 | 53.1                                      | 59.4                                              | 54.9                                      |
| Mean patient household income (k€) <sup>c</sup> | 21.7 (3.5)                                           | 21.7 (3.4)                                 | 21.8 (4.0)                                           | 22.0 (3.7)                                | 22.5 (4.6)                                        | 22.9 (5.0)                                |
| Mean patient Elixhauser (score)                 | 5.4 (3.1)                                            | 5.2 (3.0)                                  | 5.3 (3.2)                                            | 5.0 (3.0)                                 | 5.4 (3.3)                                         | 5.0 (3.3)                                 |
| Mean patient hospital frailty risk (score)      | 11.3 (8.2)                                           | 13.5 (9.7)                                 | 11.1 (8.1)                                           | 12.8 (9.4)                                | 10.0 (7.6)                                        | 13.2 (9.8)                                |
| Emergency admission (%)                         | 43.6                                                 | 55.0                                       | 55.1                                                 | 63.1                                      | 52.9                                              | 62.9                                      |
| Surgical procedure specialty (%)                |                                                      |                                            |                                                      |                                           |                                                   |                                           |
| Cardiovascular                                  | 29.8                                                 | 12.4                                       | 24.2                                                 | 9.9                                       | 27.7                                              | 7.1                                       |
| Digestive                                       | 42.8                                                 | 33.7                                       | 51.1                                                 | 39.4                                      | 52.3                                              | 34.4                                      |
| Neurological                                    | 7.5                                                  | 4.4                                        | 5.2                                                  | 3.4                                       | 3.9                                               | 1.8                                       |
| Orthopaedic                                     | 12.4                                                 | 42.2                                       | 12.3                                                 | 42.9                                      | 14.2                                              | 49.1                                      |
| Thoracic                                        | 5.1                                                  | 5.0                                        | 4.7                                                  | 3.2                                       | 1.3                                               | 3.6                                       |
| Urogenital                                      | 2.4                                                  | 2.3                                        | 2.5                                                  | 1.2                                       | 0.6                                               | 4.0                                       |
| Surgical procedure access (%)                   |                                                      |                                            |                                                      |                                           |                                                   |                                           |
| Open                                            | 94.4                                                 | 91.3                                       | 93.6                                                 | 91.4                                      | 96.8                                              | 93.3                                      |
| Videoscopic                                     | 5.6                                                  | 8.7                                        | 6.4                                                  | 8.6                                       | 3.2                                               | 6.7                                       |
| Surgical procedure severity <sup>d</sup> (%)    |                                                      |                                            |                                                      |                                           |                                                   |                                           |
| 1                                               | 7.0                                                  | 7.2                                        | 5.3                                                  | 6.6                                       | 4.5                                               | 6.7                                       |
| 2                                               | 13.5                                                 | 14.1                                       | 11.4                                                 | 14.0                                      | 9.7                                               | 14.3                                      |
| 3                                               | 17.5                                                 | 17.1                                       | 17.2                                                 | 14.0                                      | 11.6                                              | 9.8                                       |
| 4                                               | 62.0                                                 | 61.7                                       | 66.1                                                 | 65.5                                      | 74.2                                              | 69.2                                      |



**sFigure 1. Study flowchart**

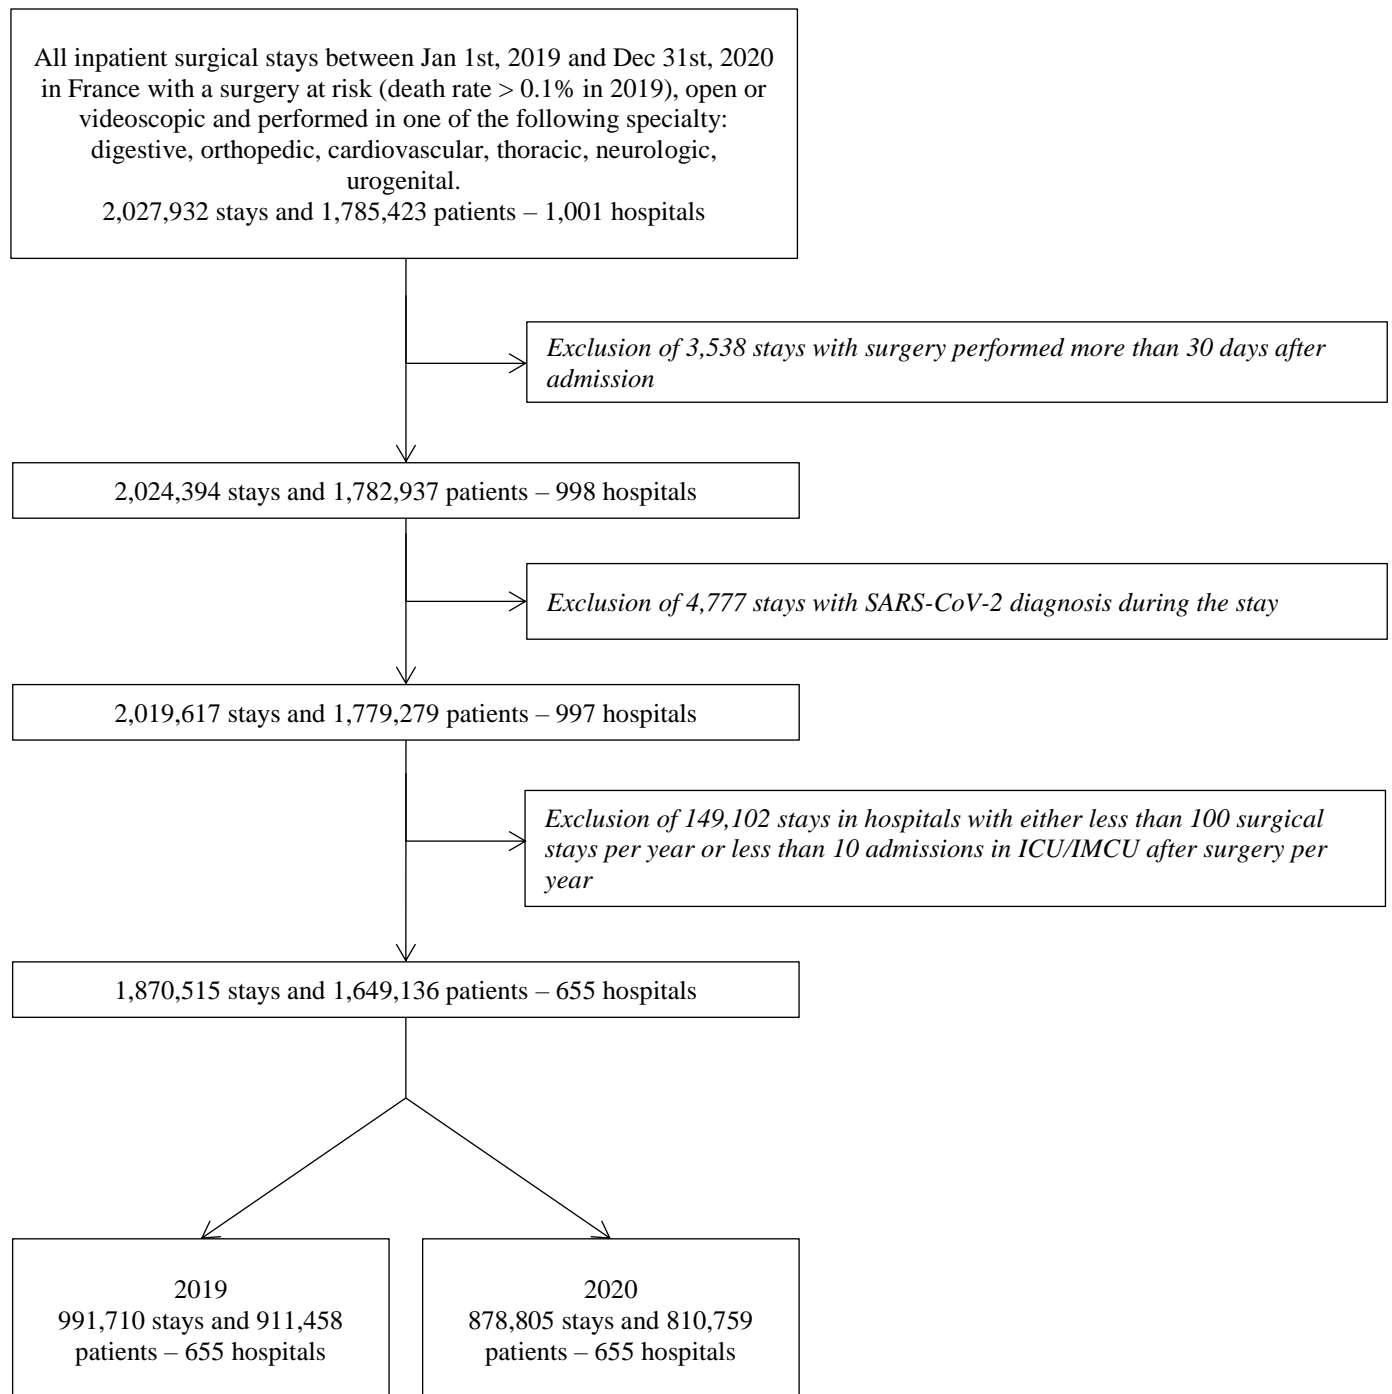

Among the 1,870,515 stays, 72,616 (3.9%) had missing median household incomes. Missing values were subsequently imputed using the median value observed per year in the hospital.

**sFigure 2. Share of surgical procedures admitted to the ICU/IMCU by pandemic exposure group**

**2A. ICU/IMCU admission after surgery**

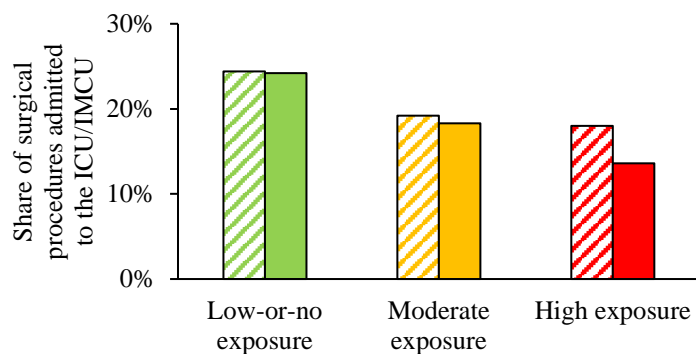

**2B. ICU admission after surgery**

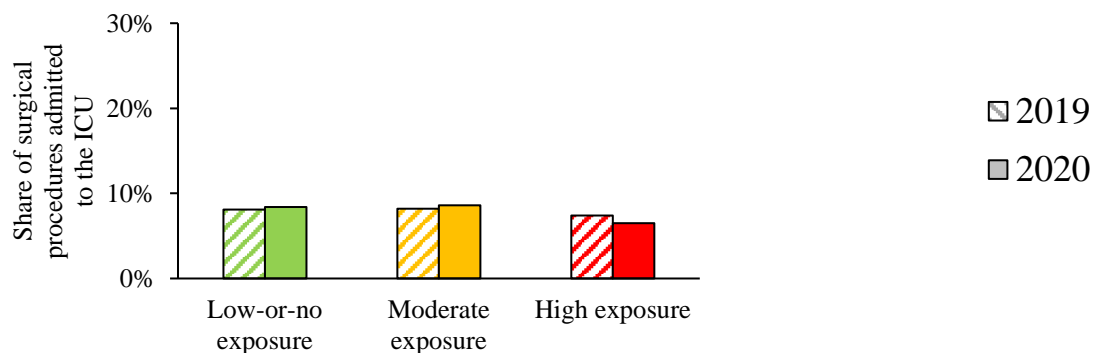

**2C. IMCU admission after surgery**

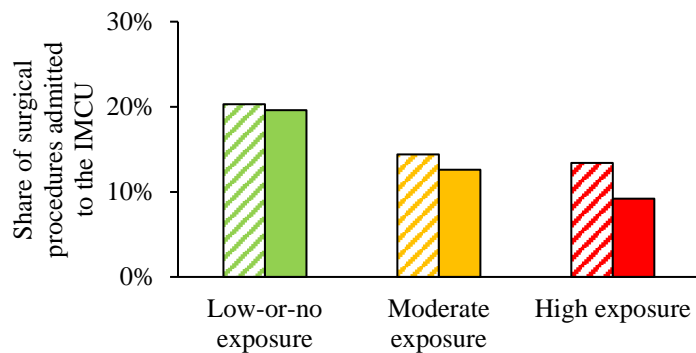

ICU/IMCUs were defined as intensive or intermediate care units.

The bar chart represents the share of surgeries with ICU/IMCU access (4a), ICU access (4b) and IMCU access (4c) between years by Pandemic Exposure Group.

**sFigure 3A. Change in exposure to COVID-19 in ICU/IMCU over time per region**

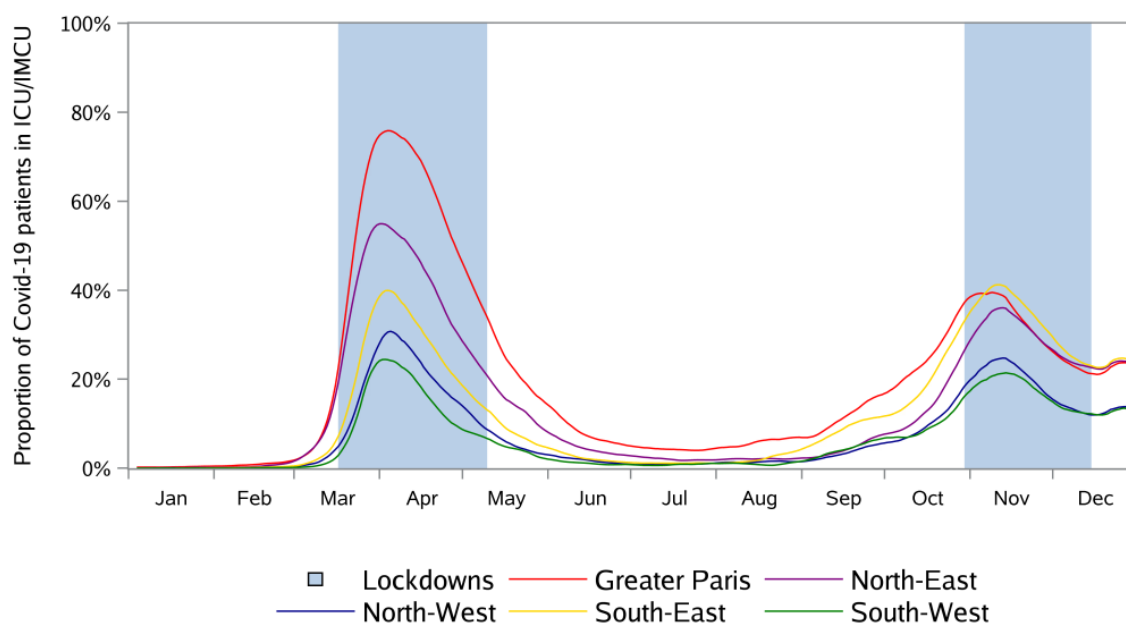

**sFigure 3B. Change in exposure to COVID-19 in ICU/IMCU over time per hospital**

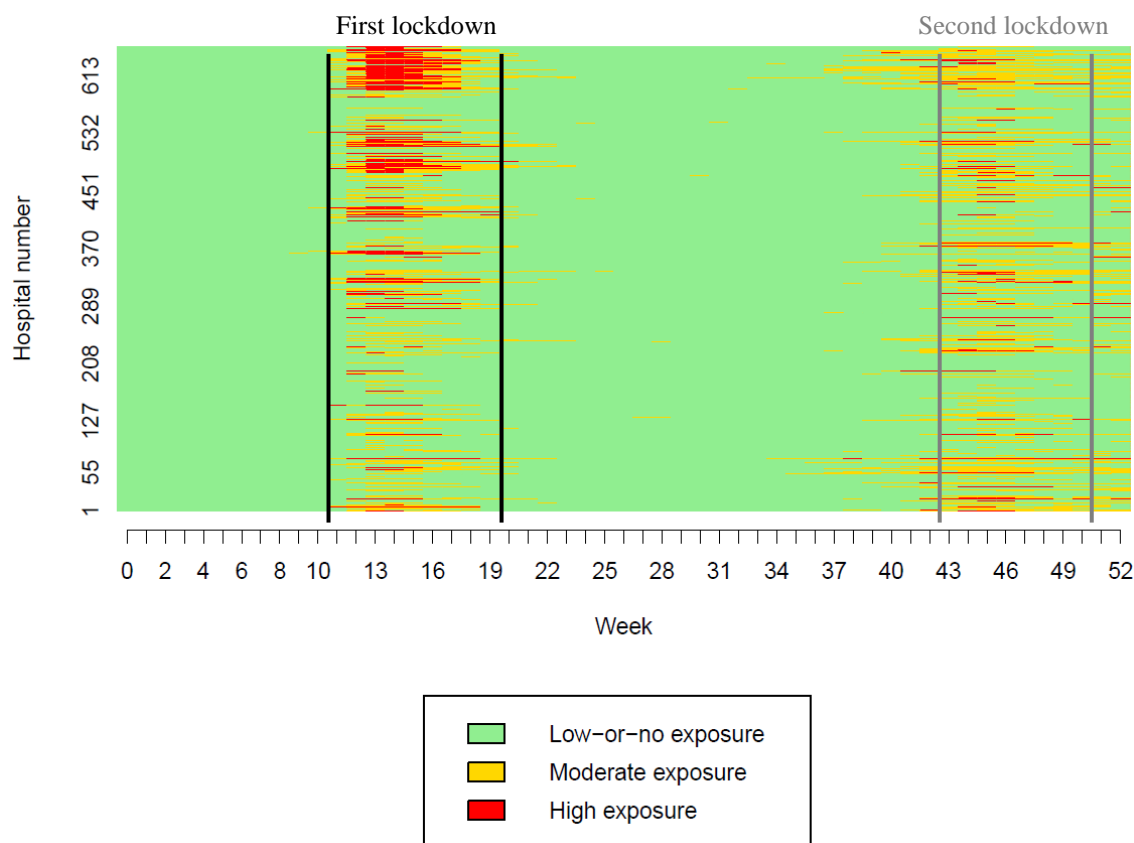

ICU/IMCUs were defined as intensive or intermediate care units.

Values in sFigure 3A. are 7-day moving averages of the proportion of COVID-19 patients in ICU/ICMU per region, plotted from January to December 2020. Bands mark the two periods of national lockdowns in France. The first lockdown took place from Mar 17 to May 10, 2020, and the second from Oct 30 to Dec 15, 2020.

The sequence index plot in sFigure 3B. represents the COVID-19 pandemic exposure category per week along the year 2020 for each hospital (n=655), with one line corresponding to a single hospital. The first lockdown occurred between weeks 11 and 19 (marked with vertical black lines), and the second between weeks 43 and 50 (marked with vertical grey lines). This chart was generated using the R package 'TraMineR'.

**sFigure 4A: Comparison of in-hospital surgical mortality risk between pandemic exposure groups by semester with related learning effect - stratified on subpopulation of elective surgeries**

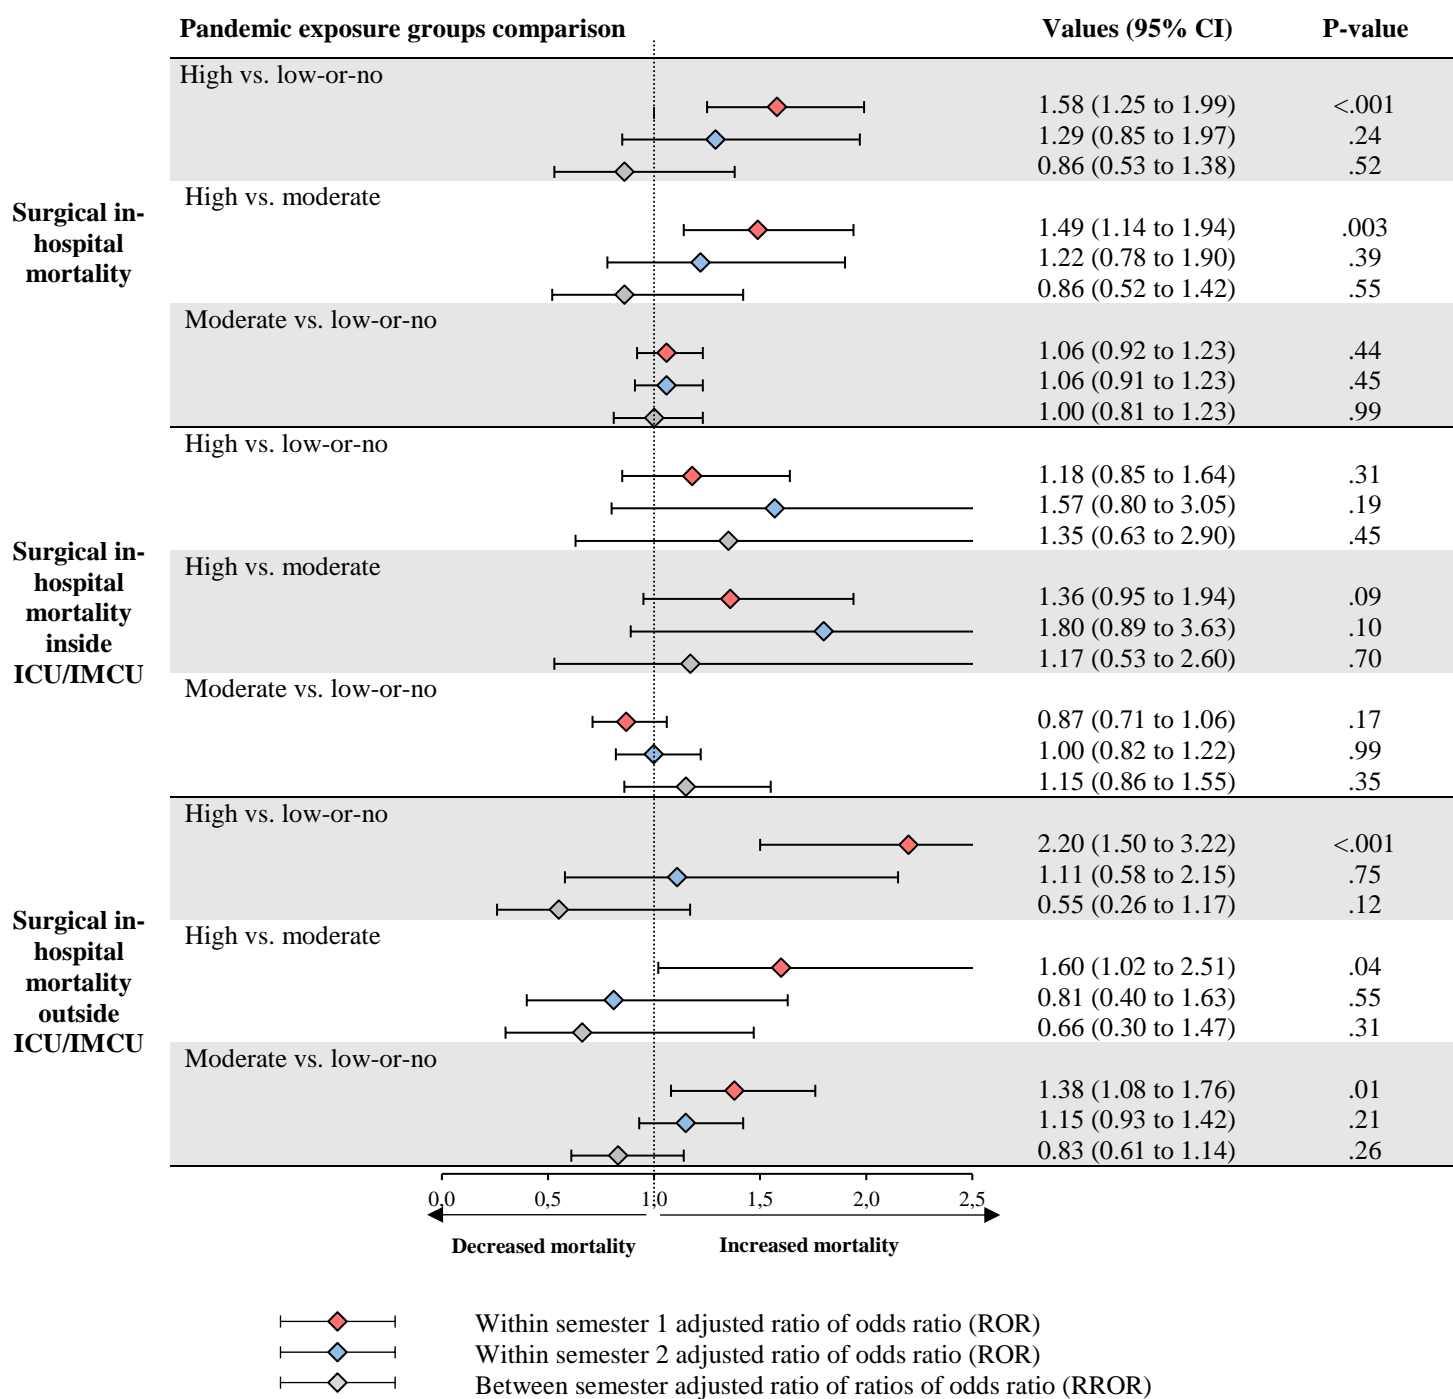

**sFigure 4B: Comparison of in-hospital surgical mortality risk between pandemic exposure groups by semester with related learning effect - stratified on subpopulation of emergency surgeries**

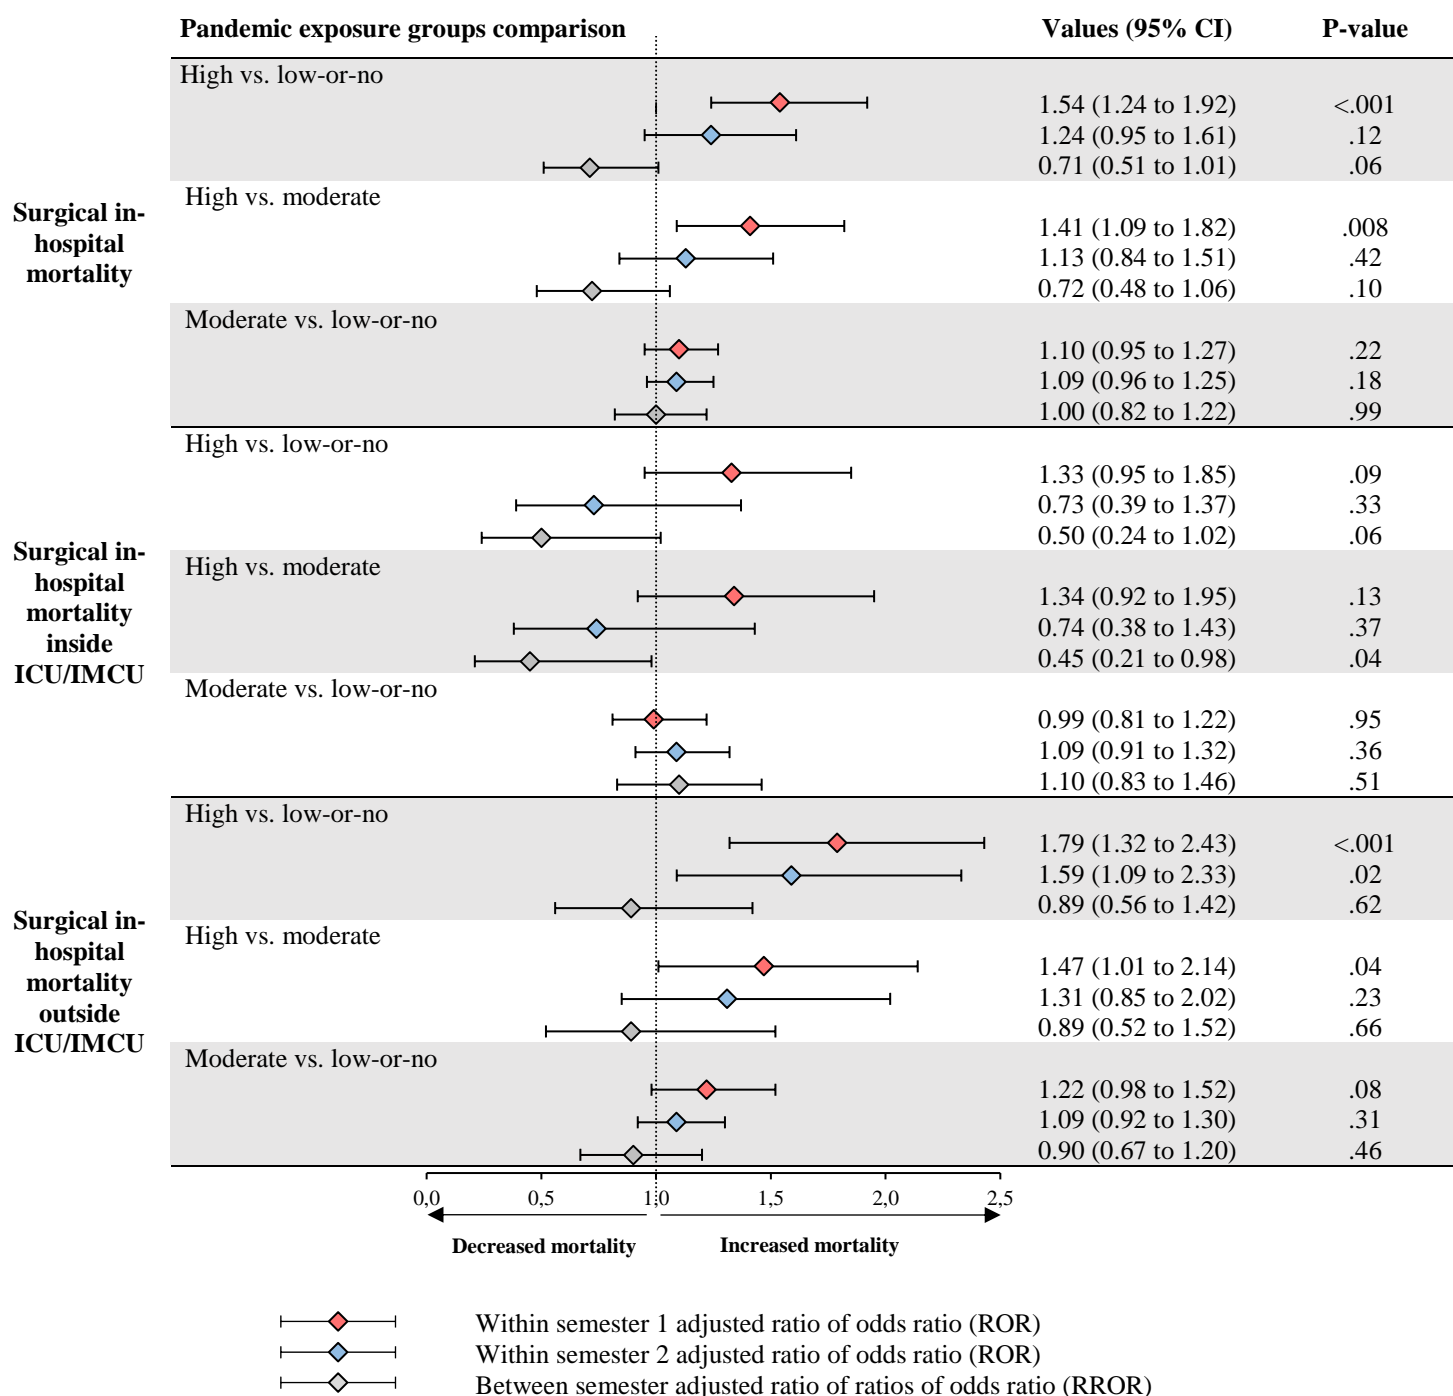

**sFigure 4C: Comparison of in-hospital surgical mortality risk between pandemic exposure groups by semester with related learning effect - stratified on subpopulations of patients admitted in ICU/IMCU, ICU and IMCU**

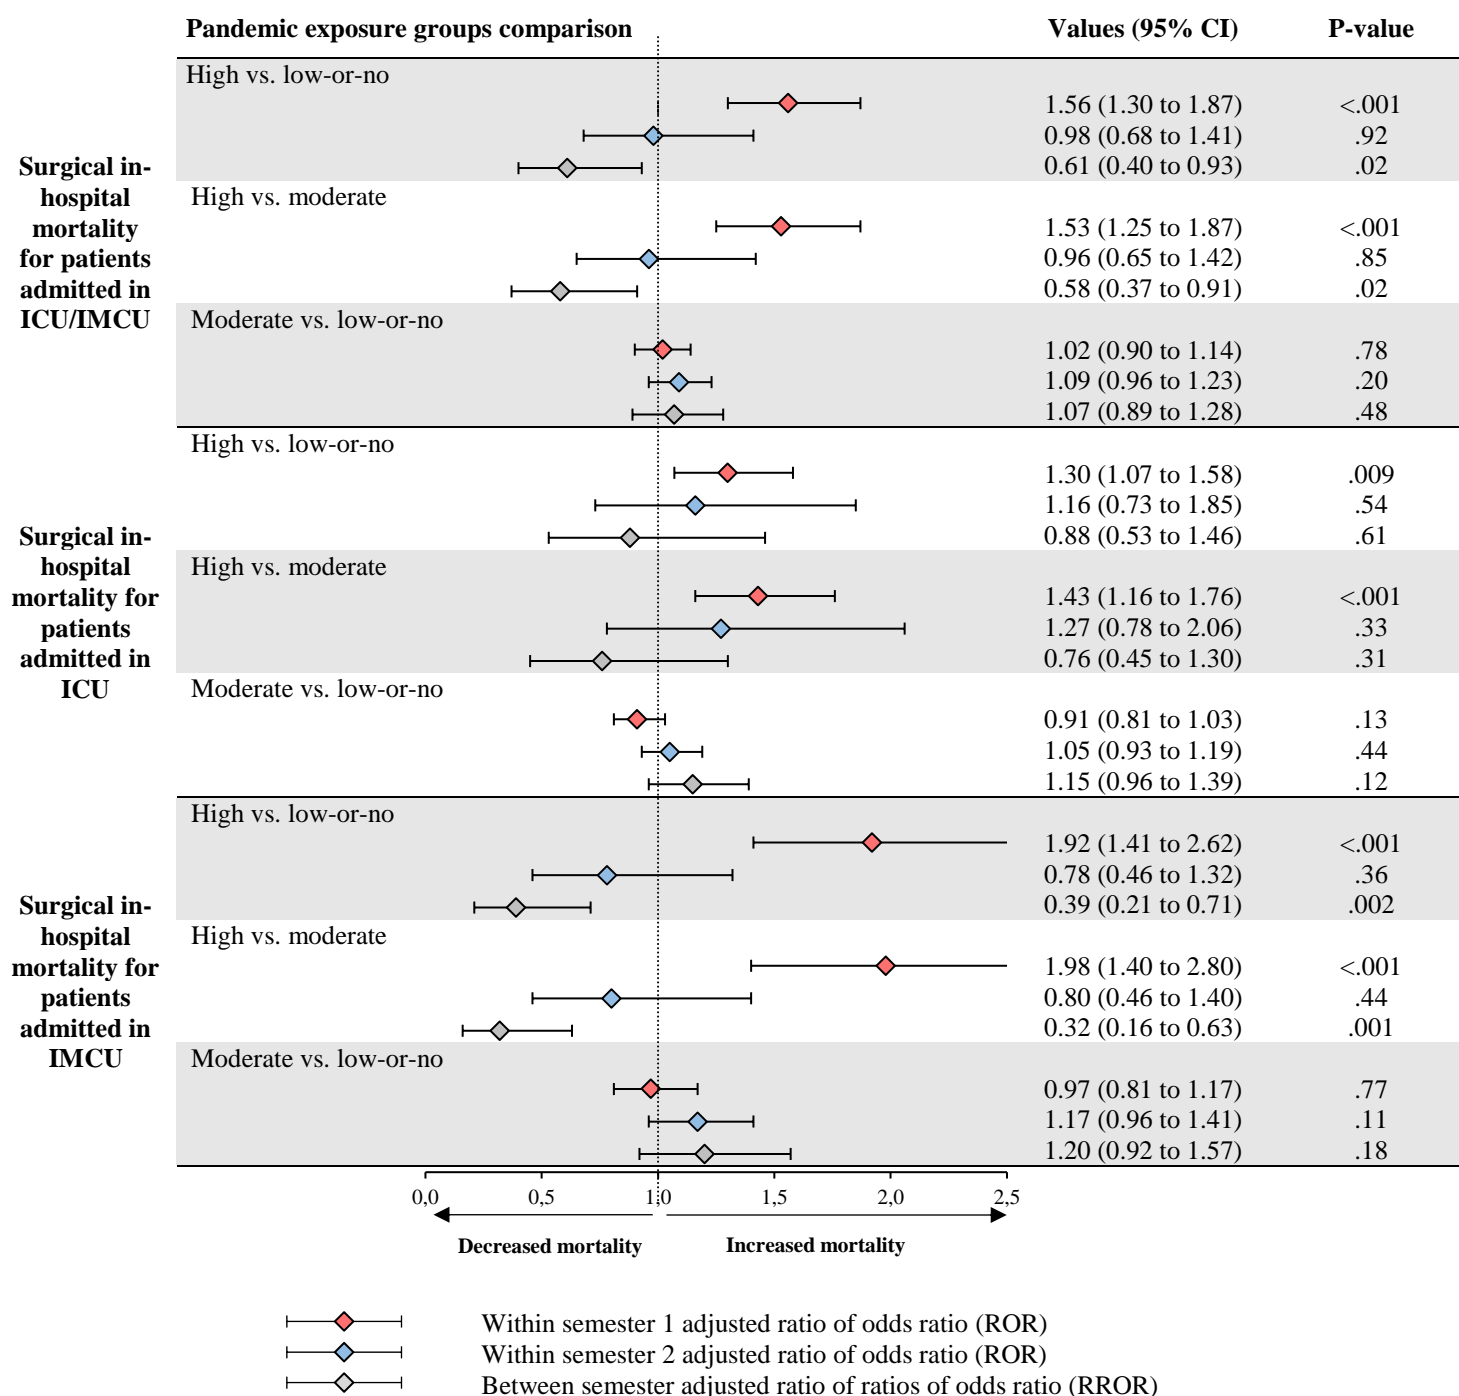

**sFigure 5. Number of surgical procedures and deaths in 2020, inside and outside ICU/ICMU**

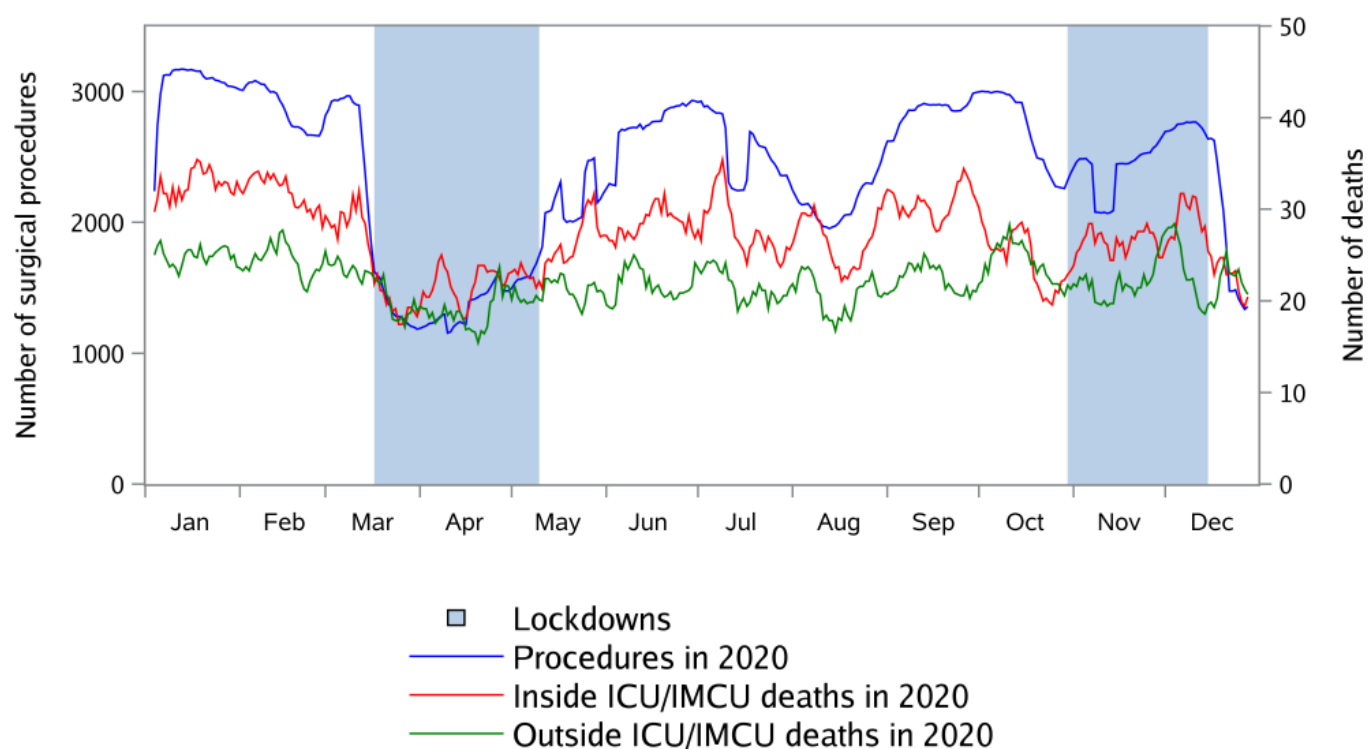

ICU/ICMUs were defined as intensive or intermediate care units.

Values in sFigure 5. are 7-day moving averages of the number of surgical procedures and the numbers of deaths inside versus outside ICU/ICMU, plotted from January to December 2020. Bands mark the two periods of national lockdowns in France. The first lockdown took place from Mar 17 to May 10, 2020, and the second from Oct 30 to Dec 15, 2020.
